# Supplementary material for: Anti-biofilm surfaces from mixed dopamine-modified polymer brushes: synergistic role of cationic and zwitterionic chains to resist staphyloccocus aureus
Source: Royal Society of Chemistry journal article supplement (doi:10.1039/c9bm01275c), 2019-01-01
Supplement: c9bm01275c6.pdf [file c9bm01275c6.pdf]

**Anti-biofilm surfaces from mixed dopamine-modified  
polymer brushes : synergistic role of cationic and  
zwitterionic chains to resist *Staphylococcus aureus***

Yuanyuan He<sup>1</sup>, Xinyuan Wan<sup>1</sup>, Kecen Xiao<sup>1</sup>, Weiwei Lin<sup>1</sup>, Jiehua Li<sup>1</sup>, Zhen Li<sup>1</sup>,  
Feng Luo<sup>\*1</sup>, Hong Tan<sup>\*1</sup>, Jianshu Li<sup>1</sup>, Qiang Fu<sup>1</sup>

<sup>1</sup> *College of Polymer Science and Engineering, State Key Laboratory of Polymer  
Materials Engineering, Sichuan University, Chengdu 610065, China*

\* E-mail: fengluo@scu.edu.cn; hongtan@scu.edu.cn

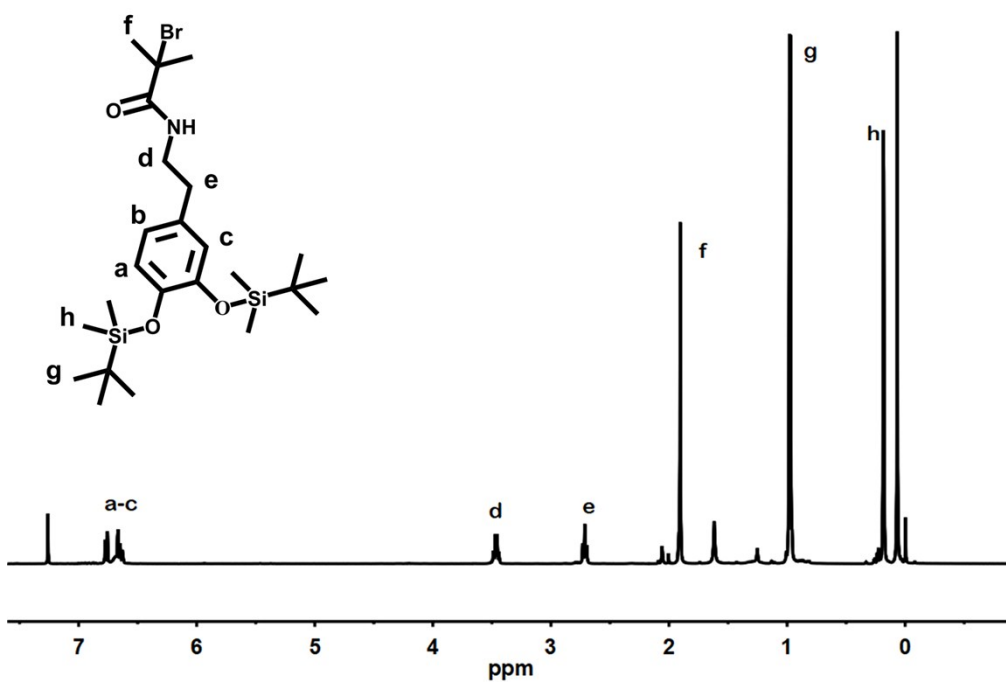

Figure S1. <sup>1</sup>H NMR spectra of DOPA (TBDMSCl)-BIBB in CDCl<sub>3</sub>.

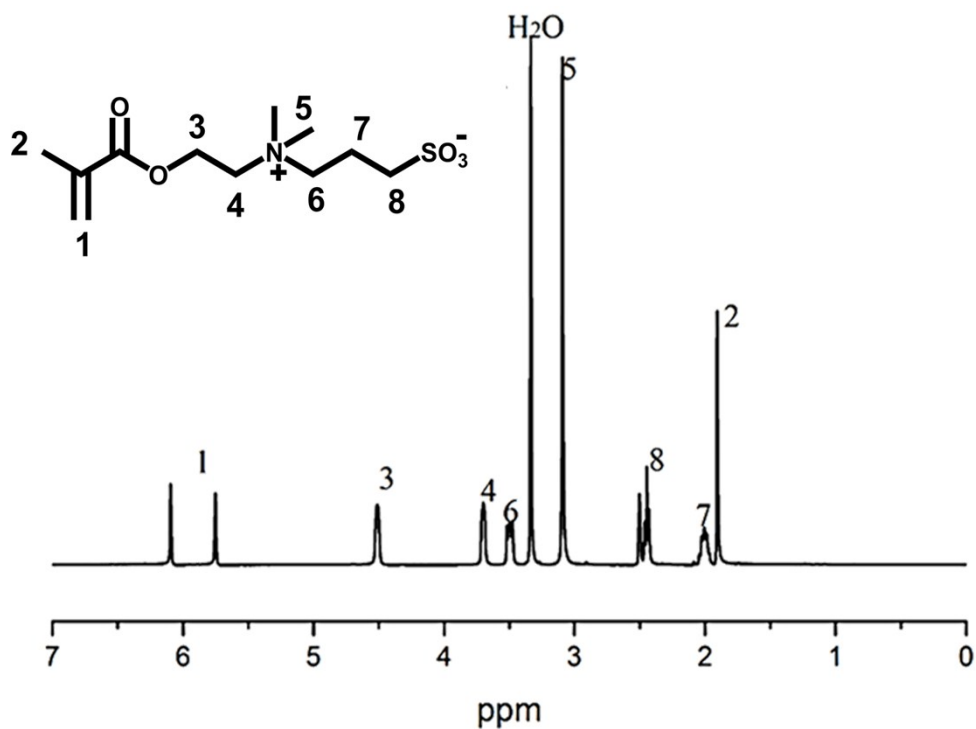

Figure S2. <sup>1</sup>H NMR spectra of SBMA in DMSO.

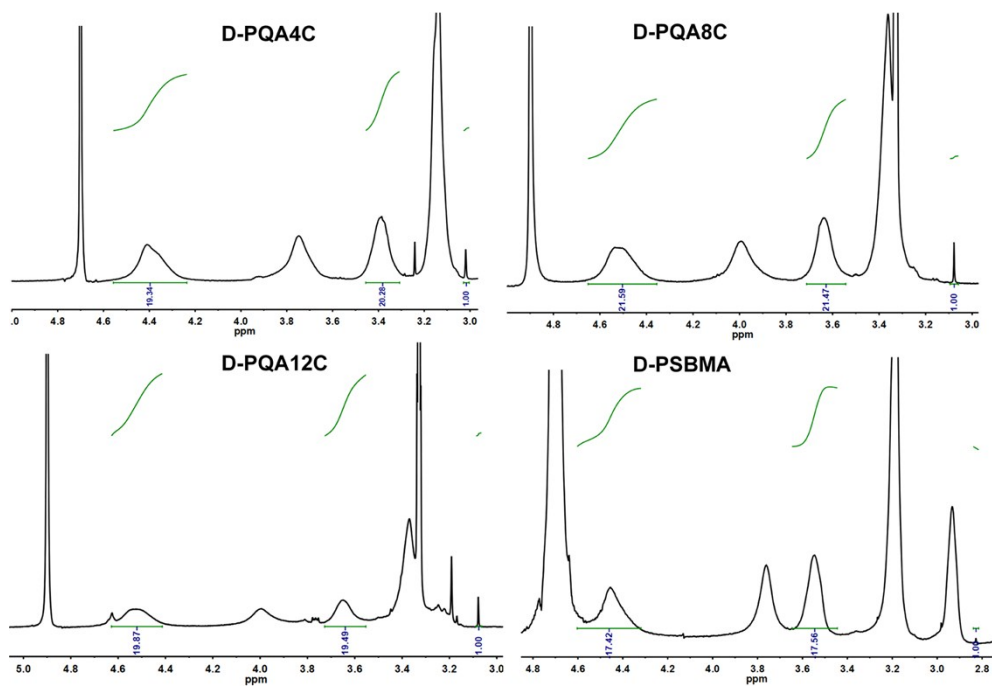

Figure S3. The calculation of the degree of polymerization (DP) of D-PQAs and D-PSBMA. The DPs for the D-PQA4C, D-PQA8C, D-PQA12C, and D-PSBMA are 20, 21, 19, and 18, respectively.

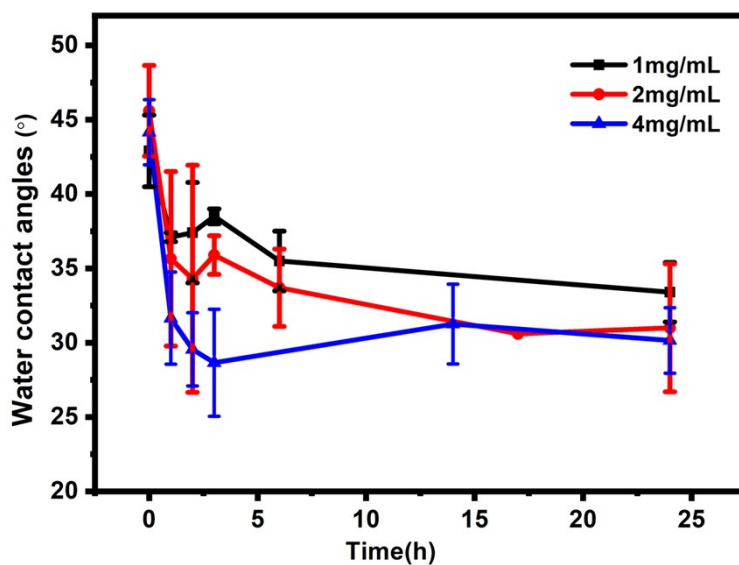

Figure S4. The water contact angles (WCA) of PQA4C brush grafting with different concentration D-PSBMA over time.

Table S1. Atomic percentages on the surfaces of PQA4C brush coating and PQA4C/PSBMA mixed brushes coating on Si wafer from XPS spectra at 90° take-off angle.

| Sample                 | Element (atom %) |      |       |      |
|------------------------|------------------|------|-------|------|
|                        | C                | N    | O     | S    |
| PQA4C                  | 50.05            | 3.52 | 47.39 | 0.00 |
| PQA4C/PSBMA 1mg/mL 1h  | 53.56            | 4.79 | 42.97 | 1.06 |
| PQA4C/PSBMA 1mg/mL 24h | 51.95            | 5.28 | 43.55 | 2.06 |
| PQA4C/PSBMA 2mg/mL 1h  | 51.17            | 6.46 | 44.15 | 1.66 |
| PQA4C/PSBMA 2mg/mL 24h | 52.26            | 5.22 | 43.71 | 1.74 |
| PQA4C/PSBMA 4mg/mL 1h  | 52.70            | 6.65 | 42.23 | 1.90 |
| PQA4C/PSBMA 4mg/mL 24h | 52.56            | 6.44 | 42.68 | 1.60 |

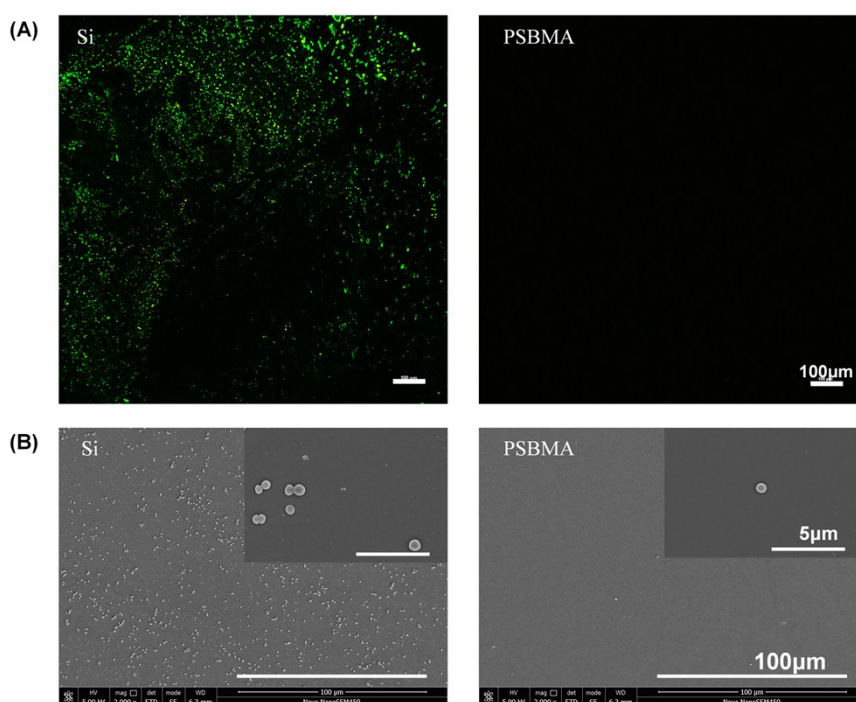

Figure S5. (A) Representative CLSM images of bacterial colonization on Si and PSBMA brushes after incubating with 1ml bacterial suspensions ( $10^5$  CFU/mL) for 24 h. Scale bars in CLSM images represent 100  $\mu$ m.(B) Representative SEM images of bacterial colonization on Si and PSBMA brushes after incubating with 1ml bacterial suspensions ( $10^5$  CFU/mL) for 24 h. Scale bars in SEM images represent 100  $\mu$ m and 5 $\mu$ m.

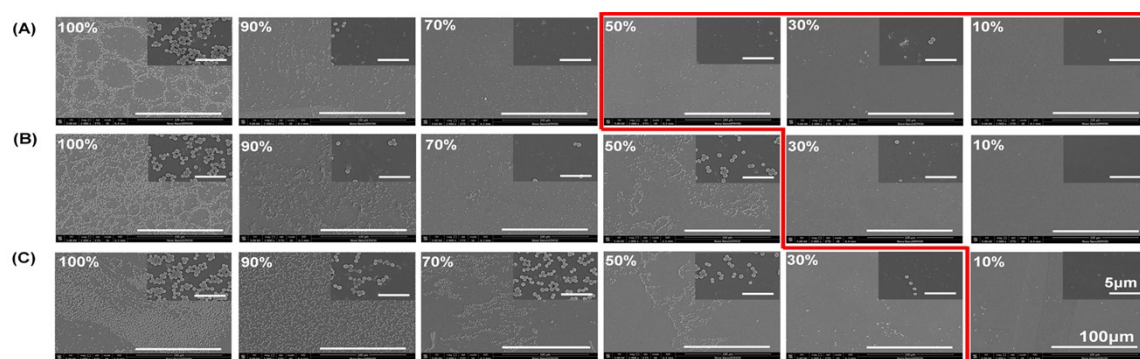

Figure S6. SEM images of bacterial colonization on PSBMA/PQAs mixed brushes (PSBMA/PQA4C(A); PSBMA/PQA8C(B); PSBMA/PQA12C(C)) after incubating with 1ml bacterial suspensions ( $10^5$  CFU/mL) for 24 h. Scale bars in SEM images represent 100  $\mu$ m and 5 $\mu$ m. The number on the upper left represent the content of PQAs. The zones of red frame show excellent antibacterial efficacy.
