# Supplementary figures and images for: Anti-biofilm surfaces from mixed dopamine-modified polymer brushes: synergistic role of cationic and zwitterionic chains to resist staphyloccocus aureus
Source: Royal Society of Chemistry journal article supplement (doi:10.1039/c9bm01275c), 2019-01-01

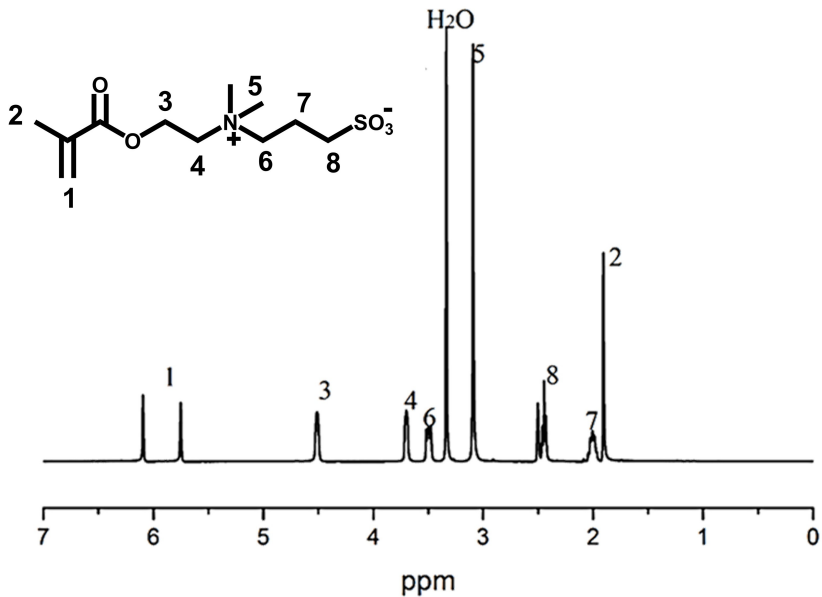

Supplement: c9bm01275c2.pdf [file c9bm01275c2.pdf]

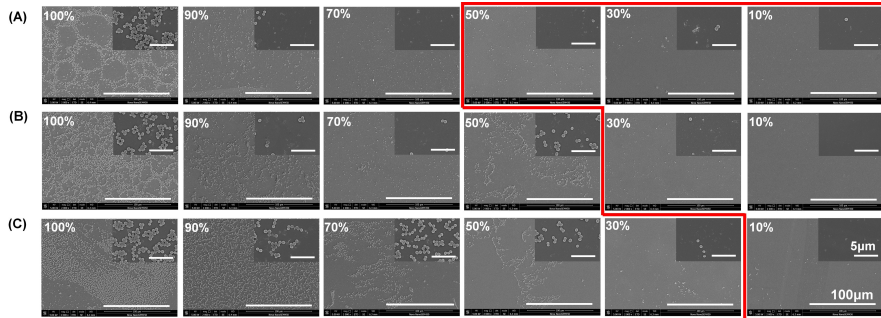

Supplement: c9bm01275c5.pdf [file c9bm01275c5.pdf]
